# Supplementary material for: Barcoding snakeheads (Teleostei, Channidae) revisited: Discovering greater species diversity and resolving perpetuated taxonomic confusions
Source: PubMed Central journal article supplement (PMC5606936; doi:10.1371/journal.pone.0184017), 2017-09-20
Supplement: pone.0184017.s006.pdf [file pone.0184017.s006.pdf]

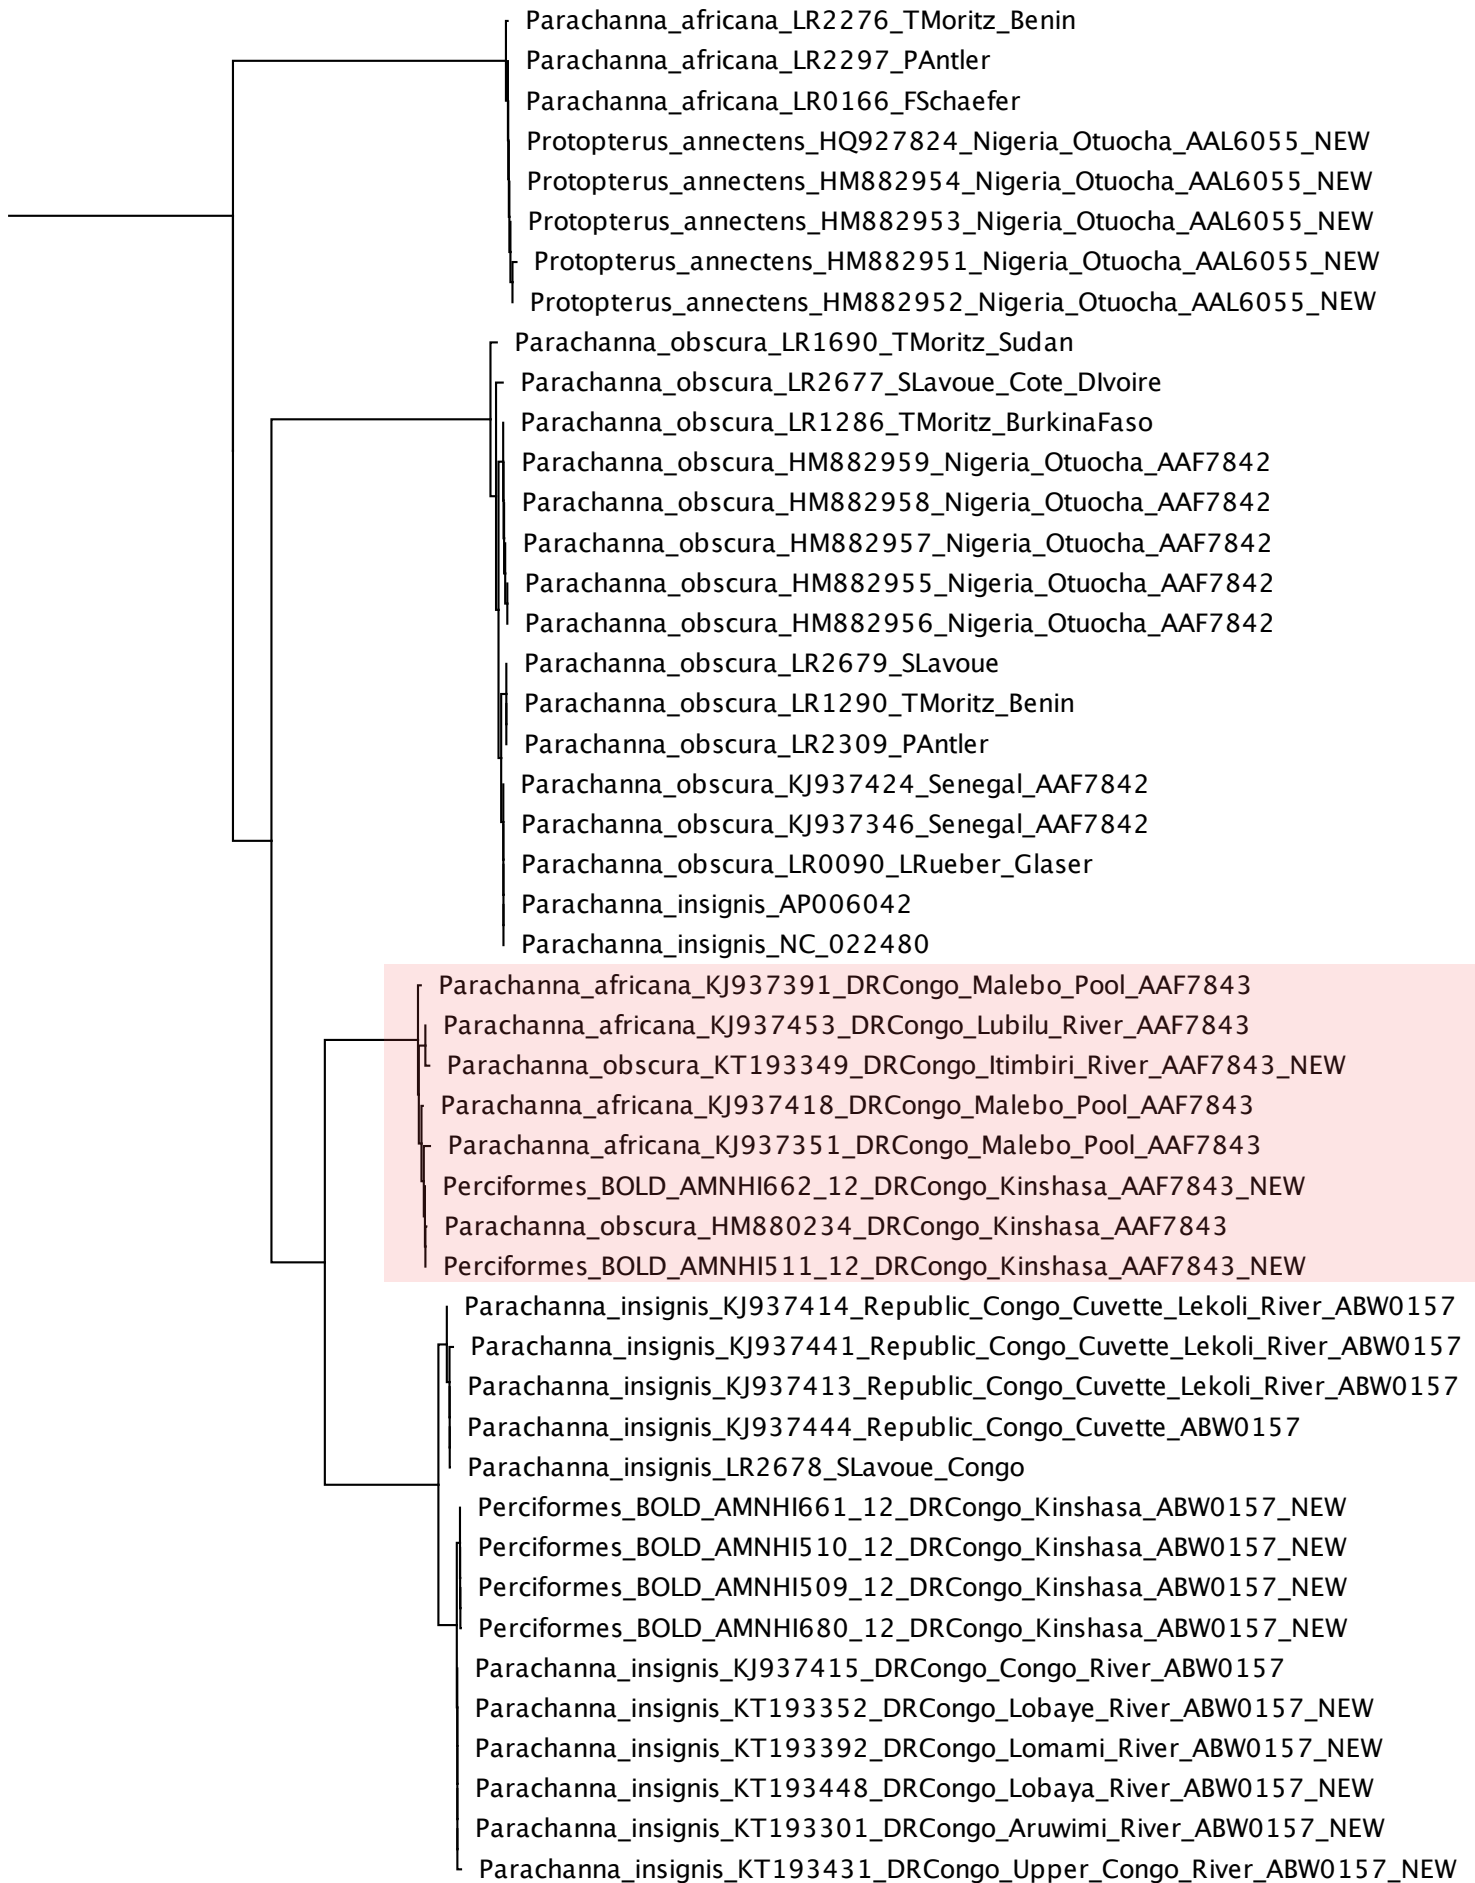

0.07
